# Supplementary material
Source: MDPI journal article supplement (https://www.mdpi.com/2073-4441/14/19/3115)
Supplement: s1 [file s1]

Table S1. Summary of microbial OTUs produced by 16S universal primer set in *C. polykrikoides* bloomed water sample in 2018.

| Phylum              | A                   |              |                       | B                   |              |                       | C                   |              |                       | D                   |              |                       | E                   |              |                   | F                   |              |                   | H                   |              |                       | I                   |              |                       | J                   |              |                       |
|---------------------|---------------------|--------------|-----------------------|---------------------|--------------|-----------------------|---------------------|--------------|-----------------------|---------------------|--------------|-----------------------|---------------------|--------------|-------------------|---------------------|--------------|-------------------|---------------------|--------------|-----------------------|---------------------|--------------|-----------------------|---------------------|--------------|-----------------------|
|                     | Merge<br>d<br>reads | Prop<br>.(%) | Numbe<br>r of<br>OTUs | Merge<br>d<br>reads | Prop<br>.(%) | Number<br>of OTUs | Merge<br>d<br>reads | Prop<br>.(%) | Number of<br>OTUs | Merge<br>d<br>reads | Prop<br>.(%) | Numbe<br>r of<br>OTUs | Merge<br>d<br>reads | Prop<br>.(%) | Numbe<br>r of<br>OTUs | Merge<br>d<br>reads | Prop<br>.(%) | Numbe<br>r of<br>OTUs |
| Actinobacteria      | 6,849               | 11.97        | 10                    | 3,775               | 14.52        | 11                    | 3,121               | 10.63        | 8                     | 634                 | 1.29         | 4                     | 1,394               | 5.51         | 7                 | 7,798               | 10.69        | 9                 | 3,804               | 3.17         | 5                     | 3,892               | 3.00         | 4                     | 5,062               | 4.08         | 6                     |
| Bacillariophyta     | 624                 | 1.09         | 5                     | 211                 | 0.81         | 3                     | 88                  | 0.30         | 1                     | 224                 | 0.45         | 3                     | 44                  | 0.17         | 1                 | 0                   | 0.00         | 0                 | 0                   | 0.00         | 0                     | 0                   | 0.00         | 0                     | 520                 | 0.42         | 2                     |
| Bacteroidetes       | 5,553               | 9.71         | 23                    | 1,881               | 7.24         | 23                    | 3,475               | 11.84        | 27                    | 10,474              | 21.24        | 21                    | 2,598               | 10.28        | 22                | 12,652              | 17.34        | 26                | 10,374              | 8.64         | 24                    | 18,911              | 14.58        | 28                    | 25,034              | 20.18        | 33                    |
| Chlamydiae          | 0                   | 0.00         | 0                     | 0                   | 0.00         | 0                     | 0                   | 0.00         | 0                     | 0                   | 0.00         | 0                     | 0                   | 0.00         | 0                 | 0                   | 0.00         | 0                 | 0                   | 0.00         | 0                     | 0                   | 0.00         | 0                     | 140                 | 0.11         | 1                     |
| Chlorophyta         | 0                   | 0.00         | 0                     | 0                   | 0.00         | 0                     | 0                   | 0.00         | 0                     | 0                   | 0.00         | 0                     | 0                   | 0.00         | 0                 | 0                   | 0.00         | 0                 | 0                   | 0.00         | 0                     | 0                   | 0.00         | 0                     | 0                   | 0.00         | 0                     |
| Cryptophyta         | 0                   | 0.00         | 0                     | 0                   | 0.00         | 0                     | 0                   | 0.00         | 0                     | 0                   | 0.00         | 0                     | 29                  | 0.11         | 1                 | 0                   | 0.00         | 0                 | 0                   | 0.00         | 0                     | 0                   | 0.00         | 0                     | 0                   | 0.00         | 0                     |
| Cyanobacteria       | 6,740               | 11.78        | 13                    | 3,551               | 13.66        | 16                    | 7,464               | 25.42        | 13                    | 2,636               | 5.35         | 8                     | 8,931               | 35.33        | 12                | 21,528              | 29.50        | 13                | 50,436              | 42.02        | 9                     | 45,503              | 35.08        | 8                     | 23,793              | 19.18        | 8                     |
| Euryarchaeota       | 1,051               | 1.84         | 6                     | 480                 | 1.85         | 5                     | 236                 | 0.80         | 2                     | 4,194               | 8.51         | 6                     | 62                  | 0.25         | 1                 | 272                 | 0.37         | 1                 | 0                   | 0.00         | 0                     | 0                   | 0.00         | 0                     | 0                   | 0.00         | 0                     |
| Foraminifera        | 1,090               | 1.91         | 1                     | 0                   | 0.00         | 0                     | 183                 | 0.62         | 1                     | 992                 | 2.01         | 1                     | 0                   | 0.00         | 0                 | 0                   | 0.00         | 0                 | 0                   | 0.00         | 0                     | 0                   | 0.00         | 0                     | 0                   | 0.00         | 0                     |
| Haptophyta          | 87                  | 0.15         | 1                     | 30                  | 0.12         | 1                     | 0                   | 0.00         | 0                     | 0                   | 0.00         | 0                     | 0                   | 0.00         | 0                 | 0                   | 0.00         | 0                 | 0                   | 0.00         | 0                     | 0                   | 0.00         | 0                     | 0                   | 0.00         | 0                     |
| Marinimicrobia      | 324                 | 0.57         | 1                     | 99                  | 0.38         | 1                     | 57                  | 0.19         | 1                     | 0                   | 0.00         | 0                     | 39                  | 0.15         | 1                 | 155                 | 0.21         | 1                 | 325                 | 0.27         | 1                     | 181                 | 0.14         | 1                     | 436                 | 0.35         | 1                     |
| Ochrophyta          | 4,589               | 8.02         | 1                     | 6,235               | 23.99        | 2                     | 1,567               | 5.34         | 1                     | 0                   | 0.00         | 0                     | 168                 | 0.66         | 1                 | 0                   | 0.00         | 0                 | 0                   | 0.00         | 0                     | 0                   | 0.00         | 0                     | 0                   | 0.00         | 0                     |
| Planctomycetes      | 0                   | 0.00         | 0                     | 0                   | 0.00         | 0                     | 0                   | 0.00         | 0                     | 0                   | 0.00         | 0                     | 0                   | 0.00         | 0                 | 0                   | 0.00         | 0                 | 159                 | 0.13         | 1                     | 530                 | 0.41         | 1                     | 0                   | 0.00         | 0                     |
| Proteobacteria      | 30,002              | 52.45        | 38                    | 9,565               | 36.80        | 38                    | 12,132              | 41.32        | 41                    | 30,158              | 61.16        | 32                    | 11,586              | 45.83        | 45                | 28,733              | 39.37        | 35                | 54,243              | 45.19        | 40                    | 56,499              | 43.56        | 47                    | 65,315              | 52.66        | 47                    |
| Verrucomicrobia     | 226                 | 0.40         | 2                     | 102                 | 0.39         | 2                     | 983                 | 3.35         | 3                     | 0                   | 0.00         | 0                     | 399                 | 1.58         | 2                 | 1,745               | 2.39         | 3                 | 680                 | 0.57         | 2                     | 3,540               | 2.73         | 3                     | 3,735               | 3.01         | 3                     |
| Eukaryote           | 0                   | 0.00         | 0                     | 0                   | 0.00         | 0                     | 0                   | 0.00         | 0                     | 0                   | 0.00         | 0                     | 0                   | 0.00         | 0                 | 0                   | 0.00         | 0                 | 0                   | 0.00         | 0                     | 157                 | 0.12         | 1                     | 0                   | 0.00         | 0                     |
| Unclassified Phylum | 66                  | 0.12         | 1                     | 65                  | 0.25         | 2                     | 55                  | 0.19         | 1                     | 0                   | 0.00         | 0                     | 32                  | 0.13         | 1                 | 96                  | 0.13         | 1                 | 0                   | 0.00         | 0                     | 502                 | 0.39         | 2                     | 0                   | 0.00         | 0                     |
| Total               | 57,201              | 100          | 102                   | 25,994              | 100          | 104                   | 29,361              | 100          | 99                    | 49,312              | 100          | 75                    | 25,282              | 100          | 94                | 72,979              | 100          | 89                | 120,021             | 100          | 82                    | 129,715             | 100          | 95                    | 124,035             | 100          | 101                   |

Table S2. Summary of microbial OTUs produced by 16S universal primer set in *C. polykrikoides* bloomed water sample in 2019.

| Phylum              | A                   |         |                       | C                   |         |                       | D                   |         |                       | E                   |         |                       | F                   |         |                       | G                   |         |                       | H                   |         |                       | I                   |         |                       | J                   |         |                       |
|---------------------|---------------------|---------|-----------------------|---------------------|---------|-----------------------|---------------------|---------|-----------------------|---------------------|---------|-----------------------|---------------------|---------|-----------------------|---------------------|---------|-----------------------|---------------------|---------|-----------------------|---------------------|---------|-----------------------|---------------------|---------|-----------------------|
|                     | Merge<br>d<br>reads | Prop(%) | Numbe<br>r of<br>OTUs |
| Actinobacteria      | 7,352               | 14.67   | 8                     | 5,458               | 11.00   | 6                     | 1,660               | 4.28    | 5                     | 2,491               | 3.60    | 3                     | 3,353               | 4.68    | 6                     | 335                 | 0.53    | 3                     | 7,524               | 8.12    | 9                     | 3,907               | 5.23    | 7                     | 5,054               | 8.03    | 8                     |
| Bacillariophyta     | 114                 | 0.23    | 1                     | 79                  | 0.16    | 1                     | 71                  | 0.18    | 1                     | 0                   | 0.00    | 0                     | 291                 | 0.41    | 1                     | 474                 | 0.75    | 2                     | 1,697               | 1.83    | 2                     | 2,178               | 2.91    | 5                     | 435                 | 0.69    | 4                     |
| Bacteroidetes       | 3,962               | 7.91    | 21                    | 1,577               | 3.18    | 10                    | 4,920               | 12.68   | 32                    | 2,803               | 4.05    | 13                    | 1,980               | 2.76    | 13                    | 5,430               | 8.58    | 9                     | 7,470               | 8.07    | 22                    | 6,248               | 8.36    | 23                    | 5,509               | 8.76    | 23                    |
| Chlamydiae          | 0                   | 0.00    | 0                     | 0                   | 0.00    | 0                     | 0                   | 0.00    | 0                     | 0                   | 0.00    | 0                     | 0                   | 0.00    | 0                     | 0                   | 0.00    | 0                     | 0                   | 0.00    | 0                     | 0                   | 0.00    | 0                     | 0                   | 0.00    | 0                     |
| Chlorophyta         | 56                  | 0.11    | 1                     | 0                   | 0.00    | 0                     | 0                   | 0.00    | 0                     | 0                   | 0.00    | 0                     | 0                   | 0.00    | 0                     | 0                   | 0.00    | 0                     | 0                   | 0.00    | 0                     | 0                   | 0.00    | 0                     | 0                   | 0.00    | 0                     |
| Cryptophyta         | 0                   | 0.00    | 0                     | 0                   | 0.00    | 0                     | 0                   | 0.00    | 0                     | 0                   | 0.00    | 0                     | 0                   | 0.00    | 0                     | 0                   | 0.00    | 0                     | 0                   | 0.00    | 0                     | 0                   | 0.00    | 0                     | 0                   | 0.00    | 0                     |
| Cyanobacteria       | 7,008               | 13.98   | 13                    | 14,341              | 28.91   | 12                    | 6,180               | 15.93   | 9                     | 21,084              | 30.46   | 11                    | 22,619              | 31.58   | 11                    | 25,037              | 39.56   | 10                    | 13,184              | 14.24   | 8                     | 11,277              | 15.08   | 8                     | 3,243               | 5.16    | 6                     |
| Euryarchaeota       | 844                 | 1.68    | 4                     | 176                 | 0.35    | 2                     | 518                 | 1.34    | 6                     | 0                   | 0.00    | 0                     | 0                   | 0.00    | 0                     | 0                   | 0.00    | 0                     | 145                 | 0.16    | 1                     | 507                 | 0.68    | 2                     | 453                 | 0.72    | 3                     |
| Foraminifera        | 0                   | 0.00    | 0                     | 72                  | 0.15    | 1                     | 138                 | 0.36    | 1                     | 135                 | 0.20    | 1                     | 607                 | 0.85    | 1                     | 111                 | 0.18    | 1                     | 5,890               | 6.36    | 3                     | 438                 | 0.59    | 2                     | 639                 | 1.02    | 2                     |
| Haptophyta          | 334                 | 0.67    | 1                     | 70                  | 0.14    | 1                     | 73                  | 0.19    | 1                     | 96                  | 0.14    | 1                     | 91                  | 0.13    | 1                     | 0                   | 0.00    | 0                     | 0                   | 0.00    | 0                     | 247                 | 0.33    | 2                     | 0                   | 0.00    | 0                     |
| Marinimicrobia      | 507                 | 1.01    | 1                     | 177                 | 0.36    | 1                     | 150                 | 0.39    | 1                     | 0                   | 0.00    | 0                     | 270                 | 0.38    | 2                     | 167                 | 0.26    | 2                     | 1,015               | 1.10    | 1                     | 480                 | 0.64    | 2                     | 301                 | 0.48    | 1                     |
| Ochrophyta          | 0                   | 0.00    | 0                     | 0                   | 0.00    | 0                     | 0                   | 0.00    | 0                     | 0                   | 0.00    | 0                     | 0                   | 0.00    | 0                     | 0                   | 0.00    | 0                     | 0                   | 0.00    | 0                     | 0                   | 0.00    | 0                     | 0                   | 0.00    | 0                     |
| Planctomycetes      | 158                 | 0.32    | 2                     | 349                 | 0.70    | 2                     | 0                   | 0.00    | 0                     | 334                 | 0.48    | 2                     | 247                 | 0.34    | 1                     | 0                   | 0.00    | 0                     | 0                   | 0.00    | 0                     | 0                   | 0.00    | 0                     | 0                   | 0.00    | 0                     |
| Proteobacteria      | 29,526              | 58.92   | 39                    | 26,443              | 53.31   | 37                    | 24,908              | 64.20   | 43                    | 36,579              | 52.84   | 42                    | 40,879              | 57.08   | 43                    | 30,987              | 48.96   | 39                    | 55,086              | 59.49   | 42                    | 48,646              | 65.06   | 42                    | 46,296              | 73.60   | 46                    |
| Verrucomicrobia     | 0                   | 0.00    | 0                     | 690                 | 1.39    | 2                     | 58                  | 0.15    | 1                     | 5,706               | 8.24    | 2                     | 914                 | 1.28    | 2                     | 0                   | 0.00    | 0                     | 278                 | 0.30    | 1                     | 0                   | 0.00    | 0                     | 809                 | 1.29    | 4                     |
| Eukaryote           | 0                   | 0.00    | 0                     | 0                   | 0.00    | 0                     | 0                   | 0.00    | 0                     | 0                   | 0.00    | 0                     | 0                   | 0.00    | 0                     | 0                   | 0.00    | 0                     | 0                   | 0.00    | 0                     | 0                   | 0.00    | 0                     | 0                   | 0.00    | 0                     |
| Unclassified Phylum | 252                 | 0.50    | 2                     | 168                 | 0.34    | 1                     | 123                 | 0.32    | 1                     | 0                   | 0.00    | 0                     | 367                 | 0.51    | 1                     | 750                 | 1.19    | 3                     | 315                 | 0.34    | 1                     | 839                 | 1.12    | 1                     | 166                 | 0.26    | 1                     |
|                     | 50,113              | 100     | 93                    | 49,600              | 100     | 76                    | 38,799              | 100     | 101                   | 69,228              | 100     | 75                    | 71,618              | 100     | 82                    | 63,291              | 100     | 69                    | 92,604              | 100     | 90                    | 74,767              | 100     | 94                    | 62,905              | 100     | 98                    |

Table S3. Summary of phytoplankton OTUs produced by p23S universal primmer set in *C. polykrikoides* bloomed water sample in 2018.

| Phylum          | A            |           |                | B            |           |                | C            |           |                | D            |           |                | E            |           |                | F            |           |                | H            |           |                | I            |           |                | J            |           |                |
|-----------------|--------------|-----------|----------------|--------------|-----------|----------------|--------------|-----------|----------------|--------------|-----------|----------------|--------------|-----------|----------------|--------------|-----------|----------------|--------------|-----------|----------------|--------------|-----------|----------------|--------------|-----------|----------------|
|                 | Merged reads | Prop. (%) | Number of OTUs | Merged reads | Prop. (%) | Number of OTUs | Merged reads | Prop. (%) | Number of OTUs | Merged reads | Prop. (%) | Number of OTUs | Merged reads | Prop. (%) | Number of OTUs | Merged reads | Prop. (%) | Number of OTUs | Merged reads | Prop. (%) | Number of OTUs | Merged reads | Prop. (%) | Number of OTUs | Merged reads | Prop. (%) | Number of OTUs |
| Cyanobacteria   | 8,279        | 13.97     | 9              | 2,095        | 4.59      | 7              | 26,351       | 31.32     | 11             | 4,163        | 19.44     | 11             | 36,049       | 59.45     | 10             | 22,975       | 44.79     | 8              | 37,305       | 63.71     | 12             | 36,531       | 70.61     | 11             | 48,743       | 85.12     | 14             |
| Bacillariophyta | 2,106        | 3.55      | 10             | 906          | 1.98      | 7              | 1,387        | 1.65      | 5              | 2,425        | 11.32     | 16             | 576          | 0.95      | 3              | 546          | 1.06      | 3              | 1,483        | 2.53      | 7              | 972          | 1.88      | 6              | 129          | 0.23      | 2              |
| Cercozoa        | 4,837        | 8.16      | 1              | 3,825        | 8.37      | 1              | 11,895       | 14.14     | 1              | 0            | 0.00      | 0              | 6,913        | 11.40     | 1              | 11,573       | 22.56     | 1              | 2,514        | 4.29      | 1              | 2,555        | 4.94      | 1              | 863          | 1.51      | 1              |
| Chlorophyta     | 9,358        | 15.79     | 6              | 2,502        | 5.48      | 6              | 4,086        | 4.86      | 3              | 2,146        | 10.02     | 9              | 2,630        | 4.34      | 4              | 1,916        | 3.73      | 3              | 11,164       | 19.07     | 7              | 5,320        | 10.28     | 6              | 492          | 0.86      | 3              |
| Cryptophyta     | 1,751        | 2.95      | 5              | 1,111        | 2.43      | 6              | 513          | 0.61      | 2              | 1,551        | 7.24      | 3              | 184          | 0.30      | 2              | 618          | 1.20      | 2              | 1,203        | 2.05      | 3              | 524          | 1.01      | 4              | 0            | 0.00      | 0              |
| Euglenophyta    | 0            | 0.00      | 0              | 0            | 0.00      | 0              | 0            | 0.00      | 0              | 0            | 0.00      | 0              | 0            | 0.00      | 0              | 0            | 0.00      | 0              | 0            | 0.00      | 0              | 0            | 0.00      | 0              | 0            | 0.00      | 0              |
| Haptophyta      | 4,008        | 6.76      | 13             | 1,424        | 3.12      | 9              | 3,409        | 4.05      | 12             | 8,886        | 41.49     | 37             | 3,868        | 6.38      | 18             | 1,208        | 2.35      | 10             | 2,285        | 3.90      | 11             | 3,977        | 7.69      | 19             | 3,552        | 6.20      | 18             |
| Miozoa          | 1,164        | 1.96      | 3              | 200          | 0.44      | 2              | 89           | 0.11      | 1              | 1,295        | 6.05      | 6              | 536          | 0.88      | 3              | 0            | 0.00      | 0              | 1,635        | 2.79      | 3              | 163          | 0.32      | 2              | 88           | 0.15      | 1              |
| Ochromphyta     | 27,515       | 46.42     | 6              | 33,580       | 73.49     | 4              | 36,395       | 43.26     | 6              | 283          | 1.32      | 2              | 9,879        | 16.29     | 11             | 12,464       | 24.30     | 6              | 968          | 1.65      | 7              | 1,525        | 2.95      | 10             | 3,307        | 5.78      | 9              |
| Unknown         | 256          | 0.43      | 2              | 49           | 0.11      | 1              | 0            | 0.00      | 0              | 668          | 3.12      | 5              | 0            | 0.00      | 0              | 0            | 0.00      | 0              | 0            | 0.00      | 0              | 170          | 0.33      | 2              | 89           | 0.16      | 1              |
| Total           | 59,274       | 100       | 55             | 45,692       | 100       | 43             | 84,125       | 100       | 41             | 21,417       | 100       | 89             | 60,635       | 100       | 52             | 51,300       | 100       | 33             | 58,557       | 100       | 51             | 51,737       | 100       | 61             | 57,263       | 100       | 49             |

Table S4. Summary of phytoplankton OTUs produced by p23S universal primmer set in *C. polykrikoides* bloomed water sample in 201

| Phylum          | A            |           |                | C            |           |                | D            |           |                | E            |           |                | F            |           |                | G            |           |                | H            |           |                | I            |           |                | J            |           |                |
|-----------------|--------------|-----------|----------------|--------------|-----------|----------------|--------------|-----------|----------------|--------------|-----------|----------------|--------------|-----------|----------------|--------------|-----------|----------------|--------------|-----------|----------------|--------------|-----------|----------------|--------------|-----------|----------------|
|                 | Merged reads | Prop. (%) | Number of OTUs | Merged reads | Prop. (%) | Number of OTUs | Merged reads | Prop. (%) | Number of OTUs | Merged reads | Prop. (%) | Number of OTUs | Merged reads | Prop. (%) | Number of OTUs | Merged reads | Prop. (%) | Number of OTUs | Merged reads | Prop. (%) | Number of OTUs | Merged reads | Prop. (%) | Number of OTUs | Merged reads | Prop. (%) | Number of OTUs |
| Cyanobacteria   | 4896         | 12.13     | 7              | 14325        | 49.57     | 11             | 11,469       | 30.14     | 10             | 16676        | 67.68     | 10             | 12498        | 36.90     | 7              | 17182        | 70.57     | 17             | 4935         | 12.49     | 3              | 6999         | 29.31     | 7              | 5778         | 19.35     | 5              |
| Bacillariophyta | 909          | 2.25      | 5              | 550          | 1.90      | 2              | 133          | 0.35      | 2              | 201          | 0.82      | 2              | 271          | 0.80      | 2              | 259          | 1.06      | 4              | 5145         | 13.02     | 8              | 2303         | 9.64      | 14             | 1355         | 4.54      | 13             |
| Cercozoa        | 5785         | 14.33     | 1              | 3840         | 13.29     | 1              | 0            | 0.00      | 0              | 2283         | 9.27      | 1              | 5541         | 16.36     | 1              | 46           | 0.19      | 1              | 15475        | 39.16     | 1              | 1548         | 6.48      | 1              | 210          | 0.70      | 1              |
| Chlorophyta     | 12825        | 31.76     | 7              | 4646         | 16.08     | 8              | 9334         | 24.53     | 9              | 1663         | 6.75      | 6              | 4508         | 13.31     | 5              | 492          | 2.02      | 3              | 5951         | 15.06     | 5              | 4286         | 17.95     | 5              | 14247        | 47.71     | 4              |
| Cryptophyta     | 755          | 1.87      | 4              | 530          | 1.83      | 4              | 1975         | 5.19      | 3              | 390          | 1.58      | 3              | 4956         | 14.63     | 1              | 445          | 1.83      | 2              | 3313         | 8.38      | 1              | 696          | 2.91      | 3              | 1913         | 6.41      | 2              |
| Euglenophyta    | 0            | 0.00      | 0              | 50           | 0.17      | 1              | 0            | 0.00      | 0              | 0            | 0.00      | 0              | 0            | 0.00      | 0              | 0            | 0.00      | 0              | 0            | 0.00      | 0              | 0            | 0.00      | 0              | 35           | 0.12      | 1              |
| Haptophyta      | 14253        | 35.30     | 18             | 3981         | 13.78     | 19             | 13607        | 35.76     | 31             | 2808         | 11.40     | 17             | 5679         | 16.77     | 24             | 5548         | 22.79     | 23             | 3992         | 10.10     | 14             | 7520         | 31.49     | 27             | 5213         | 17.46     | 23             |
| Miozoa          | 0            | 0.00      | 0              | 0            | 0.00      | 0              | 280          | 0.74      | 2              | 0            | 0.00      | 0              | 112          | 0.33      | 1              | 174          | 0.71      | 1              | 0            | 0.00      | 0              | 151          | 0.63      | 1              | 428          | 1.43      | 6              |
| Ochrophyta      | 254          | 0.63      | 3              | 837          | 2.90      | 8              | 730          | 1.92      | 2              | 484          | 1.96      | 6              | 202          | 0.60      | 3              | 0            | 0.00      | 0              | 665          | 1.68      | 5              | 84           | 0.35      | 2              | 348          | 1.17      | 4              |
| Unknown         | 698          | 1.73      | 3              | 137          | 0.47      | 2              | 526          | 1.38      | 4              | 133          | 0.54      | 2              | 102          | 0.30      | 2              | 203          | 0.83      | 3              | 42           | 0.11      | 1              | 291          | 1.22      | 7              | 334          | 1.12      | 2              |
| Total           | 40375        | 100       | 48             | 28896        | 100       | 56             | 38054        | 100       | 63             | 24638        | 100       | 47             | 33869        | 100       | 46             | 24349        | 100       | 54             | 39518        | 100       | 38             | 23878        | 100       | 67             | 29861        | 100       | 61             |
